# Supplementary material
Source: PubMed Central journal article supplement (PMC6275535)
Supplement: pnas.1809588115.sapp.pdf [file pnas.1809588115.sapp.pdf]

1 Supplementary Information for

2 **Regulatory Discrimination of mRNAs by FMRP**  
3 **Controls Mouse Adult Neural Stem Cell**  
4 **Differentiation**

5 **Botao Liu<sup>a,1</sup>, Yue Li<sup>b,c,d,1</sup>, Emily E. Stackpole<sup>a</sup>, Annie Novak<sup>b,c</sup>, Yu Gao<sup>b,c</sup>, Yinghua Zhao<sup>b,c</sup>,**  
6 **Xinyu Zhao<sup>b,c,2</sup>, and Joel D. Richter<sup>a,2</sup>**

7 <sup>a</sup>Program in Molecular Medicine, University of Massachusetts Medical School, Worcester, MA  
8 01605, USA

9 <sup>b</sup>Waisman Center, University of Wisconsin-Madison, Madison, WI 53705, USA

10 <sup>c</sup>Department of Neuroscience, University of Wisconsin-Madison, Madison, WI 53705, USA

11 <sup>d</sup>Institute of Traditional Chinese Medicine, Tianjin University of Traditional Chinese Medicine,  
12 Tianjin 301617, China

13 <sup>1</sup>B.L. and Y.L. contributed equally to this work

14 <sup>2</sup>To whom correspondence may be addressed. Email: joel.richter@umassmed.edu (J.D.R) or  
15 xinyu.zhao@wisc.edu (X.Z).

16 **Corresponding Author**

17 Joel D. Richter

18 Email: joel.richter@umassmed.edu

19 **This PDF file includes:**

20       Supplementary text

21       Figs. S1 to S4

22       Tables S1 to S3

23       Captions for databases S1 to S3

24       References for SI reference citations

25 **Other supplementary materials for this manuscript include the following:**

26       Datasets S1 to S3

## 1 **SI Materials and Methods**

### 2 **Adult neural stem cell isolation and culture**

3 All animal procedures were performed according to protocols approved by the University of  
4 Wisconsin-Madison Animal Care and Use Committee. Adult-derived NSCs were isolated from  
5 the dentate gyrus (DG) of 8- to 10-week-old male *Fmr1* KO mice (FVB/N *Fmr1*<sup>tm1Cgr</sup> mice,  
6 Jackson) and wild-type (WT) littermate controls based on our published method (1). Briefly, DG  
7 were dissected using forceps and 27gauge needle (BD, #305109) and placed in Hank's balanced  
8 salt solution (HBSS, Invitrogen, #14025-126) on ice. Tissue was spun down and digested using  
9 MACS Neural Tissue Dissociation kit (Miltenyi Biotech, #130-090-753). After dissociation with  
10 a fire-polished glass pipette, cells were filtered through a 70- $\mu$ m cell strainer (BD Falcon,  
11 #252350) and washed with HBSS, the single-cell suspension from each sample was collected  
12 and cultured in proliferation medium [Neurobasal medium containing B27 serum-free  
13 supplement (Invitrogen, #17504-044), 10 ng/ml basic fibroblast growth factor (FGF-2,  
14 PeproTech, #K1606), 10 ng/ml epidermal growth factor (EGF, PeproTech, #A2306), 1%  
15 Antibiotic-Antimycotic, and 2 mM L-glutamine], in a 5% CO<sub>2</sub> incubator at 37°C. Half of the  
16 medium was replaced every two days. Independently isolated cells served as biological  
17 replicates.

### 18 **Ribosome profiling**

19 Cycloheximide (CHX, Sigma-Aldrich, #C7698) was added into cultured aNSCs to a final  
20 concentration of 100 $\mu$ g/ml, and cells were incubated at 37 °C for 10 min to stabilize ribosomes.  
21 Then, cells were transported to cold room and spun down gently at 1000g for 3 min and the  
22 supernatant was carefully discarded. Cells were washed twice with ice-cold PBS containing  
23 100 $\mu$ g/ml CHX and were spun down at 1000g for 3 minutes. The supernatant was carefully  
24 removed to collect the cell pellet. The cell pellet was immediately stored and kept in -80 °C  
25 freezer for later analysis.

26 Frozen cell pellets were thawed in ice-cold polysome lysis buffer [20mM Tris-HCl  
27 pH7.4, 5mM MgCl<sub>2</sub>, 100mM KCl, 1mM DTT, 100 $\mu$ g/ml CHX, 25U/ml Turbo DNaseI (Ambion,  
28 #AM2238), 1% TritonX-100 in nuclease-free water] and lysed by trituration through a 25-G  
29 needle for 10 times. After 10-min incubation on ice, lysates were clarified by centrifugation at  
30 14,000g 4 °C for 10min. The supernatants were collected and the amounts of nucleic acids (A<sub>260</sub>  
31 units) were measured with Nanodrop (Thermo Fisher Scientific). For each sample, cytoplasmic

1 RNA for RNA-seq was purified from one fourth of the lysate with TRIzol LS reagent  
2 (Invitrogen, #10296028). The other three fourths of the lysate was digested with 100ng/A<sub>260</sub>  
3 RNase A (Ambion, #AM2270) and 60U/A<sub>260</sub> RNase T1 (Thermo Fisher Scientific, #EN0542) at  
4 25°C for 30min. The digestion was stopped by adding 50U SUPERase In RNase inhibitor  
5 (Ambion, #AM2694) and chilling on ice. Digested lysates were loaded on 10%-50% sucrose  
6 gradients prepared in 1X polysome buffer (20mM Tris-HCl pH7.4, 5mM MgCl<sub>2</sub>, 100mM KCl,  
7 1mM DTT, 100µg/ml CHX in nuclease-free water). After the ultracentrifugation in a SW41Ti  
8 rotor (Beckman Coulter) at 35,000 rpm 4°C for 2.5 hours, gradients were fractionated at 1.5  
9 ml/min and 12 sec collection interval through a fractionation system (Brandel) that continually  
10 monitored A<sub>260</sub> values. Monosome fractions were identified, pooled, and extracted with TRIzol  
11 LS.

12 For the cytoplasmic RNA-seq, 500ng total RNA per sample was used for the library  
13 preparation with the Ovation RNA-Seq System V2 (NuGEN, #0304) following manufacturer's  
14 instructions. HL-dsDNase (ArcticZymes, #70800-201) method was used to eliminate DNA  
15 contamination and cDNA was fragmented with M220 Covaris Focused-ultrasonicator for a target  
16 median fragment size of 300bp (peak power: 50.0, duty factor 20.0, cycles/burst: 200, treatment  
17 time: 75sec). qPCR test was performed with EvaGreen Dye (Biotium, #31000-T) to determine  
18 the optimal PCR cycles.

19 For the ribosome profiling samples, libraries were prepared following the published  
20 protocols (2). Briefly, rRNA was depleted from the purified monosomal RNA samples with  
21 RiboZero (Illumina, #MRZG12324). Remaining RNA samples were separated on a 15% TBU  
22 gel (National Diagnostics, #EC-833) and the ribosome footprints were size-selected based on the  
23 26 and 34nt markers. RNA was eluted from the crushed gel pieces in RNA elution buffer  
24 (300mM NaOAc pH5.5, 1mM EDTA, 0.25% SDS) at room temperature overnight, filtered with  
25 Spin-X Centrifuge Tube Filters (Corning, #8162) and precipitated with equal volume of  
26 isopropanol. Recovered RNA was dephosphorylated with T4 Polynucleotide Kinase (NEB,  
27 #M0201S) and ligated with preadenylated adaptor in miRCat®-33 Conversion Oligos Pack  
28 (IDT) using T4RNL2Tr.K227Q ligase (NEB, #M0351L). Reverse transcription (RT) was  
29 performed with primers containing 5nt-barcode and 8nt-unique molecular identifier (UMI) and  
30 SuperScript III (Invitrogen, #18080-044) in 1X first-strand buffer without MgCl<sub>2</sub> (50 mM Tris-  
31 HCl, pH 8.3, 75 mM KCl). RT products were separated on a 10% TBU gel and the 130-140nt

1 region was selected. cDNA was eluted in DNA elution buffer (10mM Tris pH 8.0, 300mM NaCl,  
2 1mM EDTA) at room temperature overnight, filtered, and precipitated with isopropanol. Purified  
3 cDNA was circularized with CircLigase (Epicentre, #CL4115K). cDNA derived from remaining  
4 rRNA was hybridized to biotin-labelled antisense probes (IDT) and further depleted with  
5 Dynabeads MyOne Streptavidin C1 (Invitrogen, #65001). Optimal PCR cycle was determined  
6 empirically by test PCR reactions with titrated cycle numbers. Final PCR amplification was  
7 performed with KAPA Library Amplification Kit (Kapa Biosystems, #KK2611) and 180-190bp  
8 products were size-selected on an 8% TBE gel. DNA was eluted in DNA elution buffer, filtered,  
9 and precipitated with isopropanol. The final library DNA was purified with AMPure XP beads  
10 (Beckman Coulter, #A63880). Oligos used for the library preparation are listed in SI Appendix  
11 (Table S3).

12 The size distributions of final libraries were measured by Fragment Analyzer (Advanced  
13 Analytical, performed by Molecular Biology Core Labs at UMMS). The concentrations were  
14 quantified with KAPA Library Quantification Kit (Kapa Biosystems, #KK4835). Libraries were  
15 pooled with equal molar ratios, denatured, diluted, and sequenced with NextSeq 500/550 High  
16 Output Kit v2 (Illumina, 75bp single-end runs for ribosome profiling, #FC-404-2005; 75bp pair-  
17 end runs for RNA-seq, #FC-404-2002) on a Nextseq500 sequencer (Illumina). The raw  
18 sequencing data reported in this paper have been deposited in GEO under accession number  
19 GSE112502.

### 20 **Read mapping and quality control**

21 For ribosome profiling data, individual samples were separated from the raw fastq files based on  
22 the barcode sequences. Adaptor sequences  
23 (TGGAATTCTCGGGTGCCAAGGAGATCGGAAGAGCGGTTCAGCAGGAATGCCGAGA  
24 CCG) were removed with cutadapt (1.7.1). Trimmed reads were quality filtered and mapped to  
25 the mouse rRNA and then tRNA references with Bowtie2 (2.1.0). Unmapped reads were next  
26 mapped to the mm10 mouse genome with Tophat2 (2.0.9). PCR duplicates were marked based  
27 on the UMI sequences and only uniquely mapped reads without duplicates were retained with  
28 samtools (0.0.19) for the downstream analysis. For RNA-seq data, reads unmapped to rRNA and  
29 tRNA were mapped to mm10 genome with Tophat2, but only the Read 1 of the paired-end reads  
30 was used for the quality control and visualization purposes.

1 Bam files from four biological replicates were merged to reveal the global distribution of  
2 reads. Reads mapped to 5'UTR, CDS, and 3'UTR regions were counted after intersecting the  
3 bam files with bed annotation files (USCS genome browser) using bedtools (2.22.0). RPF length  
4 distribution, P-site offsets, and frame preference were calculated with plastid (0.4.8). Counts at  
5 each nucleotide position were extracted using P-sites of RPFs and 5'end of mRNA reads with  
6 +11 offset. For all the transcript-level analysis, one representative transcript isoform with the  
7 highest abundance for each gene was selected based on the WT RNA-seq data. Only transcripts  
8 with UTRs longer than 90nt, CDS longer than 300nt, and minimum 50 reads on CDS were  
9 included for the metagene analysis. Counts at each nucleotide position was first normalized to  
10 the mean read density on CDS and then averaged across the transcriptome to obtain the global  
11 pattern of read distributions.

## 12 **Differential translation analysis**

13 Cleaned bam files of RPFs were converted to fastq files with bedtools. Cleaned fastq files  
14 without rRNA or tRNA were used for RNA-seq quantification. For both ribosome profiling and  
15 RNA-seq, gene expression was quantified with RSEM (1.2.11) using the cleaned fastq files and  
16 Refseq (V69) mouse CDS without the first and last 30nt to avoid the translation initiation and  
17 termination peaks. Genes were filtered with minimum 10 reads across all replicates and then the  
18 read counts were batch-corrected with the Combat function in sva (3.24.4) using a full model  
19 matrix. Batch-corrected counts were normalized with trimmed mean of M values (TMM) method  
20 and used to identify differential expressed genes (DEGs) with anota2seq (1.0.0). Instead of the  
21 default setting, the priorities of translation and buffering groups were determined by the nominal  
22 p-values and were set to be higher than the priority of mRNA only groups. The minimum  
23 nominal p-value cut-off (0.05) that allows the identification of most possible FMRP CLIP genes  
24 as "Translation up" and "Buffering up" was used as the optimal cut-off (SI Appendix, Figure  
25 S1F). A permutation test was performed to estimate the false discovery rate (FDR) under the  
26 selected cut-offs (absolute fold changes  $> 1.2$  and nominal p-value  $< 0.05$ ).

27 GO analysis was performed with DAVID 6.8 using all genes past filtering in the dataset  
28 as the background. For the mRNA feature analysis, lengths of 5'UTR, CDS, and 3'UTR with  
29 minimum 20nt were extracted from the Refseq annotation file (UCSC genome browser). GC  
30 content was calculated based on the sequences. Minimum Free Energies (MEFs) were calculated  
31 by the RNAfold function in ViennaRNA package (2.1.6). Wilcoxon rank sum test was used to

1 compare the median of a feature measurement (e.g. mRNA expression) in a regulatory gene  
2 group (e.g. “Buffering up”) to the median of that feature in all genes used for DEG analysis.  
3 Bonferroni method was used for the multiple test correction. Expression changes of “mRNA up”  
4 and “mRNA down” groups were used to infer upstream regulators by Ingenuity Pathway  
5 Analysis (QIAGEN) using Ingenuity Knowledge Base (Genes Only) as the reference set. Read  
6 counts at each nucleotide position of a transcript were averaged across four biological replicates  
7 after the batch-correction. Processed counts were smoothed within a 30nt window and plotted to  
8 visualize gene expression changes. For the overlap analysis between genes in each regulatory  
9 group and FMRP CLIP genes, all the genes with mRNA expression comparable to that of DEGs  
10 in WT aNSCs were used as the background to correct the expression level bias. Statistical  
11 significance is calculated with a hypergeometric test with Bonferroni correction (SI Appendix,  
12 Table S2). For the transcripts with RPFs on 5’UTR, 5’UTR/CDS read ratios were calculated for  
13 both WT and *Fmr1* KO aNSCs and the fold changes were plotted.

#### 14 **FMRP CLIP data re-analysis**

15 FMRP CLIP data from age P11 and P13 mouse brain polysomes were downloaded from GEO  
16 (GSE45148) and processed as described in the original study (3). The centers of CLIP tags were  
17 used as the putative FMRP binding sites. Sequences of +/- 50nt windows surrounding CLIP  
18 peaks with more than 5 tags on transcripts with more than 50 tags were extracted. The enriched  
19 motifs were identified with the DREME function in MEME suite (4.9.1).

#### 20 **shRNA plasmid construction**

21 Lenti-shNdn was cloned using lentivirus-sh-Control vector as the backbone (4). Briefly, shNdn  
22 (5'- GCTAACCGTGAAATCACCAAG -3') was designed for targeting mouse *Ndn*. The shNC  
23 sequence (5'-GGAATCTCATTCGATGCATAC-3') was published previously (4). The shRNA  
24 sequences together with the loop sequence (TCAAGAG), U6 promoter and restriction sites  
25 (HpaI and ClaI) were cloned using two rounds of PCRs with Lenti-U6 promoter-sh-Control  
26 vector as the template. The U6-shRNA cassettes were then cloned into lenti-U6-sh-Control  
27 vector via HpaI and ClaI restriction sites using the In-fusion kit (Clontech, #638909) according  
28 to its instructions. All plasmid constructs were verified by DNA sequencing. Primers used for  
29 cloning are listed in SI Appendix (Table S3).

30

31

## 1 **Lentivirus production**

2 Lentivirus production was performed as described previous (5). Briefly, lenti-viral DNA was co-  
3 transfected with packaging plasmids pMDL, REV and pCMV-Vsvg into 5×15 cm dishes of  
4 HEK293T cells using the calcium phosphate method. The medium containing lentivirus was  
5 collected at 36 and 60 hours post-transfection, pooled, filtered through a 0.2- $\mu$ m filter, and  
6 concentrated by ultracentrifugation at 19,000 rpm for 2 hours at 4°C using a SW27 rotor  
7 (Beckman). The virus was washed once and then resuspended in 100  $\mu$ l PBS. We routinely  
8 obtained  $1 \times 10^9$  infectious lentiviral particles /ml. To study the effects of *Ndn* on the proliferation  
9 and differentiation of aNSCs,  $1 \times 10^7$  viral particles were added to the aNSCs cultured in  
10 proliferating condition on a 10-cm dish. After a 2-day incubation, infected aNSCs were  
11 trypsinized and plated on 24-well plates (Fisher, #87721), at a density of  $1 \times 10^5$  cells/well, for  
12 the proliferation or differentiation analysis.

## 13 **Proliferation and differentiation assays**

14 Proliferation and differentiation of aNSCs were analyzed as described (4). We used only early  
15 passage cells (between passage 4 and 10) and only the same passage numbers of WT and *Fmr1*  
16 KO cells. For each experiment, duplicate wells of cells were analyzed, and results were averaged  
17 as one data point (N=1). At least 3 independent biological replicates were used (N=3) for  
18 statistical analyses. To study cell proliferation, we dissociated neural stem cells with trypsin and  
19 plated them on 24-well plates with poly-L-ornithine (Sigma-Aldrich, #P3655) and Laminin (BD  
20 Biosciences, #354232)-coated coverslips at a density of  $1 \times 10^5$  cells/well in proliferation medium  
21 (see above). At 18 hours post-plating, 5 $\mu$ M 5- bromo-2'-deoxyuridine (BrdU, Sigma-Aldrich,  
22 #B5002) was added into the culture medium for 6 hours. aNSCs were then washed with PBS and  
23 fixed with 4% paraformaldehyde for 30 min at room temperature, followed by  
24 immunohistochemical analysis. To detect BrdU incorporation, fixed cells were pretreated with  
25 1M HCl for 30 min at 37°C, washed with borate buffer, pH 8.5, for 30 min, and followed by the  
26 standard immunocytochemical protocol (6). For the differentiation assay, at 24 hours post-  
27 plating, cells were changed into differentiation medium, which is Neurobasal medium containing  
28 5  $\mu$ M forskolin (Sigma-Aldrich, #F-6886) and 1  $\mu$ M retinoic acid (Sigma-Aldrich, #R-2625) for  
29 4 days. Upon fixation with 4% paraformaldehyde, the coverslips were subjected to our standard  
30 immunohistochemistry protocol (6).

31

## 1 **Immunocytochemistry**

2 Immunocytochemistry staining was carried out as described (4, 6). Briefly, cells were fixed with  
3 4% paraformaldehyde for 20 min, and then washed with Tris-buffered saline (TBS, 50 mM Tris-  
4 Cl, pH 7.5, 150 mM NaCl) for 30 min. Cells were preblocked using TBS containing 2% normal  
5 goat serum (VECTOR, #S-1000) and 0.1% Triton X-100 for 30 min, followed by overnight  
6 incubation with primary antibodies. After washing with TBS, cells were incubated with  
7 fluorescent secondary antibodies, followed by counterstaining with the fluorescent nuclear dye  
8 4', 6 -dimidino-2'-phenylindole dihydrochloride (DAPI, Roche Applied Science). The coverslips  
9 were mounted with polyvinyl alcohol (PVA) mounting medium with DABCO (Sigma-Aldrich,  
10 #10981) and stored in cold and dark before and during analysis. The numbers of marker-positive  
11 cells (BrdU<sup>+</sup>, Tuj1<sup>+</sup> or GFAP<sup>+</sup>) and total lenti-infected cells (shRNA-GFP<sup>+</sup>) were quantified  
12 using an Olympus BX51 microscope equipped with a MicroFire digital camera (Optronics) and a  
13 motorized stage using 20X objective lens. The quantification was carried out using an unbiased  
14 stereology method with assistance from Stereo Investigator software (MBF Biosciences). The  
15 percentage of differentiated cells was calculated as the number of marker-positive cells divided  
16 by the total number of GFP<sup>+</sup> cells. At least 3 independently viral infected cell cultures were  
17 analyzed for statistical analysis

## 18 **Ndn mRNA Stability Assay**

19 aNSCs from WT and *Fmr1* KO mice were grown in proliferating condition (see above). 10  
20 µg/ml of Actinomycin D (Sigma-Aldrich) was added based on published protocol (4) and total  
21 RNA was isolated at various time intervals. The *Ndn* mRNA level was normalized to *Gapdh*  
22 mRNA as measured by quantitative PCR.

## 23 **RNA purification and quantitative PCR**

24 Total RNA was purified from cells using the TRIzol reagent (Invitrogen, #15596018) and then  
25 reverse transcribed to cDNA with the QuantiTect Reverse Transcription Kit (QIAGEN,  
26 #205311) following manufacturer's instructions. qPCR was performed with the iTaq universal  
27 SYBR Green supermix (Bio-rad, #1725122) on an Applied Biosystems quantitative PCR system  
28 with StepOne software. mRNA levels were normalized to the geometric mean of *Gapdh* and  
29 *Actb* levels for each sample and 2 technical replicates were averaged for each biological  
30 replicate. Primers are listed in SI Appendix (Table S3).

31



## 1 **JC-10 assay**

2 The mitochondrial membrane potential in WT and *Fmr1* KO aNSCs was determined by JC-10  
3 Mitochondrial Membrane Potential Assay Kit (Abcam), following the manufacturer's protocol.  
4 Briefly, aNSCs were stained with JC-10 solution for 30 min at 37°C. After adding buffer B,  
5 aNSCs were imaged using an A1RSi confocal microscope system (Nikon) with a 20X objective.  
6 At least 50 cells were randomly selected from each cell line and the fluorescent intensities of  
7 F520 and F590 were measured after subtracting background pixel intensity in the same image  
8 using Image J software (NIH). The average intensity from each cell line (at least 50 cells) was  
9 counted as N=1 for statistical analysis. The mitochondrial membrane potential was assessed by  
10 quantifying the ratio between red fluorescence (590 nm) and green fluorescence (520 nm)  
11 intensities.

## 12 **Oxygen consumption rate (OCR) analysis**

13 OCR analysis was performed using the Seahorse XF Cell Mito Stress Test Kit and an Agilent  
14 Seahorse XF-24 Analyzer based on the protocol provided by the vendor. Briefly, we plated  
15  $1 \times 10^4$  aNSCs per well in a 96-well plate. At 24 hours post-plating, we changed the medium to  
16 assay medium provided in the kit and preincubated for 1 hour before the assay. The next steps  
17 were performed following the protocol provided in the kit without alteration. The data were  
18 generated and analyzed by the XF-24 analyzer.

## 19 **Quantification and statistical analysis**

20 Statistical details of each experiment are included in the figure legends. Statistical analysis was  
21 performed using ANOVA and Student's t test, unless specified, with the Graphpad software.  
22 Two-tailed and unpaired t-test was used to compare two conditions. Two-way ANOVA was used  
23 for comparison among multiple experimental conditions. Tukey post hoc tests were used when  
24 comparing among each condition. For *Ndn* mRNA stability analysis, two-way ANOVA was used  
25 for comparison of the different decay rates. All data were shown as means  $\pm$  SEM. Probabilities  
26 of  $p < 0.05$  were considered as significant. For cell culture experiments, independently isolated  
27 cells served as biological replicates and 3 independent biological replicates were used ( $N = 3$ ) for  
28 statistical analyses. A permutation test was performed in R to estimate the false discovery rate  
29 (FDR) under the selected cut-offs (absolute fold changes  $> 1.2$  and nominal p-value  $< 0.05$ ) for  
30 identifying DEGs. Hypergeometric tests with Bonferroni correction were performed in R for  
31 analyses of overlaps of gene groups. Variance of genomic data is shown in box and whisker

- 1 plots. Wilcoxon rank sum tests with Bonferroni correction were performed in R for changes
- 2 among regulatory groups.

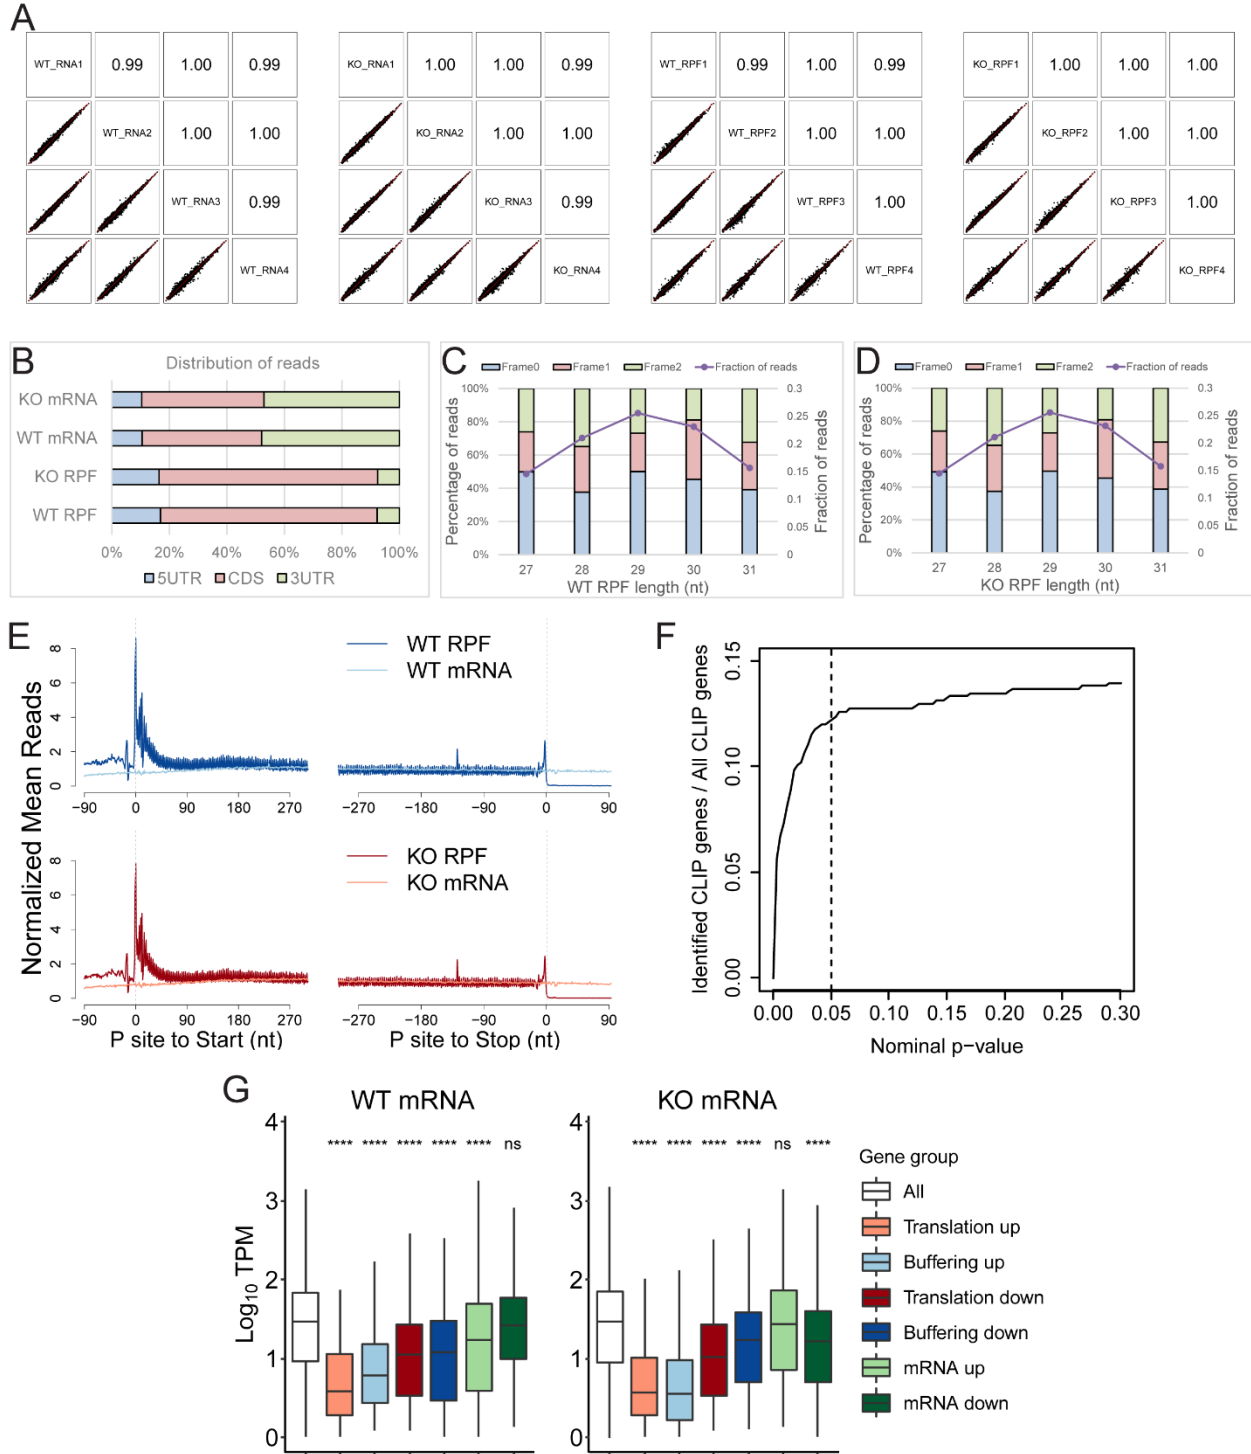

1

2 **Figure S1. Quality Control of Ribosome Profiling Data. Related to Figure 1.**

3 (A) Scatter plot and correlation coefficient of gene expression (regularized-log transformed

4 counts) between biological replicates to show the high reproducibility.

- 1 (B) Distribution of ribosome protected footprints (RPFs) and RNA-seq reads on different mRNA  
2 regions. Reads are aggregated from all four biological replicates.
- 3 (C) Distribution of RPF length and frame preference in WT aNSCs.
- 4 (D) Distribution of RPF length and frame preference in *Fmr1* KO aNSCs.
- 5 (E) Metagene plot of RPFs and mRNA reads in WT (upper panel) and *Fmr1* KO (lower panel)  
6 aNSCs. Reads are mapped across the entire transcriptome, and aligned at the annotated start and  
7 stop codons. The read densities at each nucleotide position are averaged using the P sites of  
8 RPFs and 5'ends of mRNA reads.
- 9 (F) Plot shows the fraction of CLIP genes identified as “Translation up” or “Buffering up” with  
10 an increasing nominal p-value cut-off to determine the optimal p-value cut-off for the differential  
11 gene expression analysis.
- 12 (G) mRNA expression levels (TPM, transcript per million) in different regulatory groups were  
13 compared to those of all genes used for DEG analysis (ns: not significant, \*\*\*\* p<0.0001,  
14 Wilcoxon rank sum test after multiple test correction with Bonferroni method).

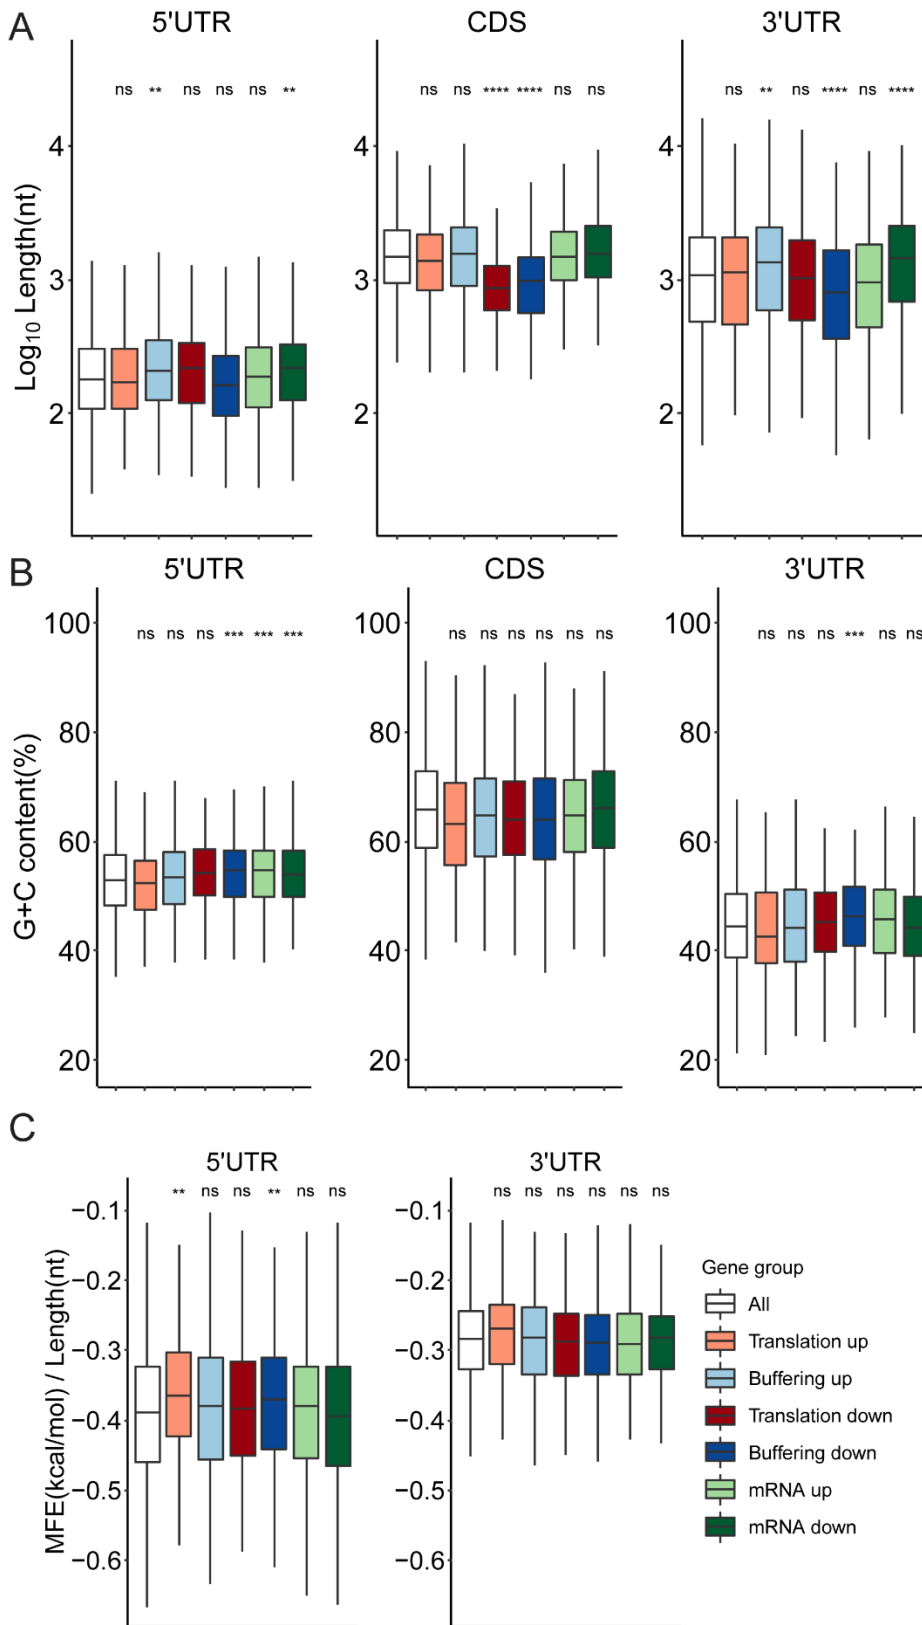

- 1 **Figure S2. Features of mRNAs in Different Regulatory Groups. Related to Figure 1.**
- 2 (A) Boxplots of lengths of 5'UTR, CDS, and 3'UTR in different regulatory groups.
- 3 (B) Boxplots of GC contents of 5'UTR, CDS, and 3'UTR in different regulatory groups.
- 4 (C) Boxplots of length normalized minimum folding energy (MFE) of 5'UTR and 3'UTR in
- 5 different regulatory groups. All results were from the comparisons to all genes used for DEG
- 6 analysis (ns: not significant, \*\*  $p < 0.01$ , \*\*\*  $p < 0.001$ , \*\*\*\*  $p < 0.0001$ , Wilcoxon rank sum test
- 7 after multiple test correction with Bonferroni method).

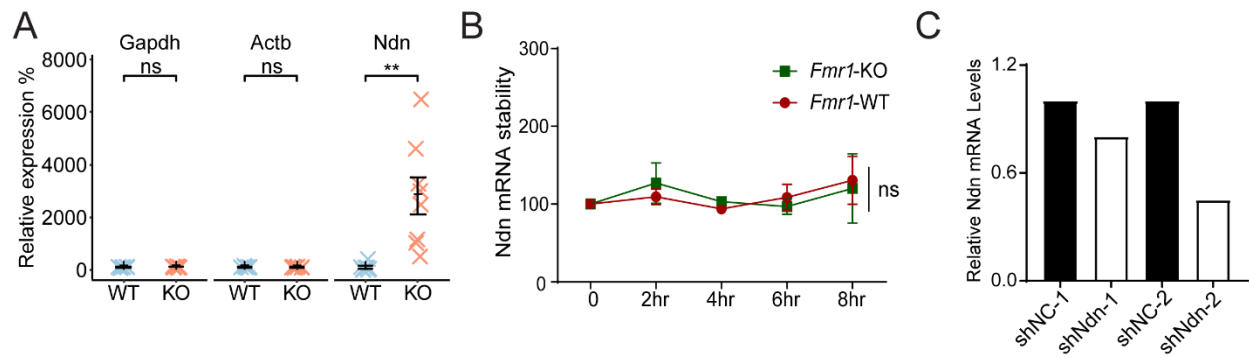

1

2 **Figure S3. *Ndn* mRNA level and stability in aNSCs. Related to Figure 2.**

3 (A) RT-qPCR validation of *Ndn* mRNA changes. Data are represented as mean ± SEM (N=8, \*\*  
 4 p<0.01, two-tailed Student's t-test).

5 (B) *Ndn* mRNA stability in WT and *Fmr1* KO aNSCs treated with actinomycin D to inhibit  
 6 transcription. The percentage of *Ndn* mRNA remaining in the aNSCs was quantified using  
 7 qPCR. Comparisons of the different decay rates were performed by two-way analysis of variance  
 8 (ANOVA) (N=3). ns: not significant. Data are represented as mean ± SEM.

9 (C) Quantitative analysis of *Ndn* mRNA in WT aNSCs after shRNA knockdown. N=2.

10

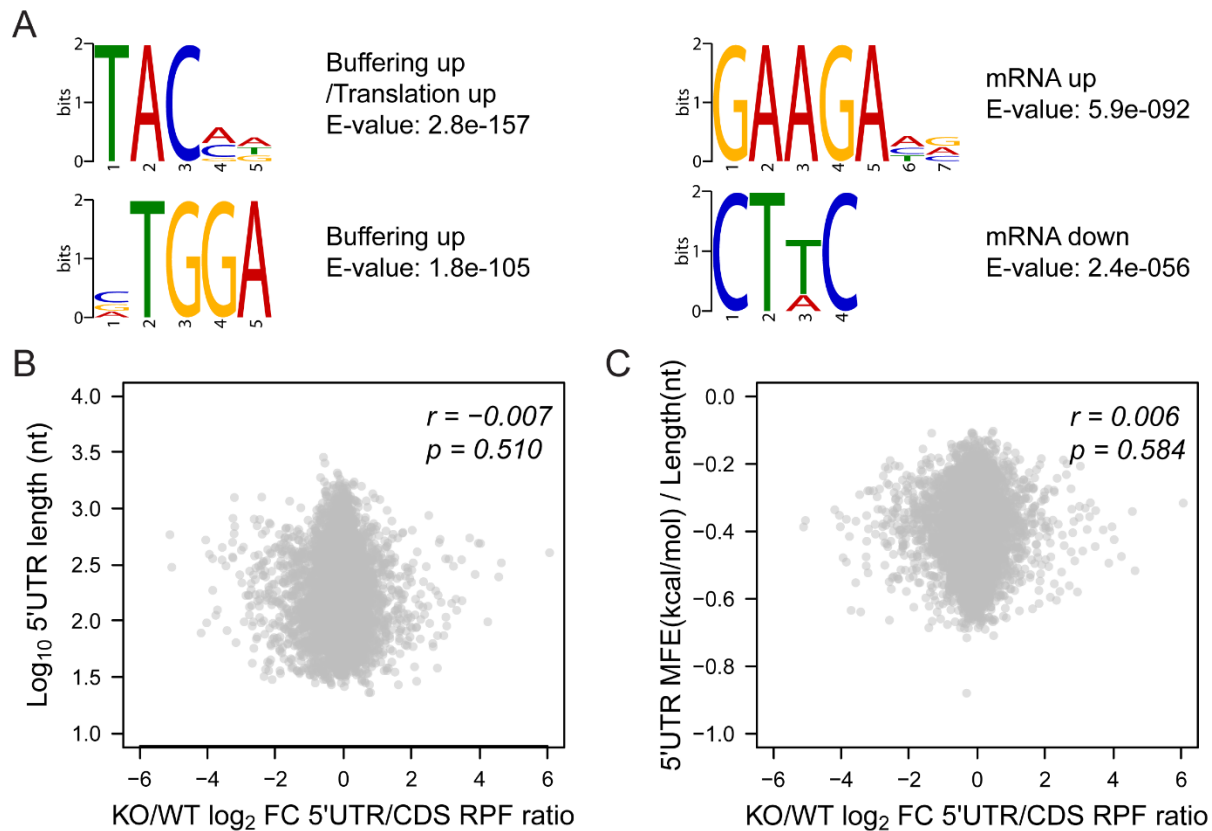

1

2 **Figure S4. FMRP Binding Motifs and uORF Translation. Related to Figure 3.**

3 (A) Combinatory analysis of FMRP CLIP and ribosome profiling data reveals distinct candidate  
4 motifs in different regulatory groups.

5 (B) Scatter plot with Pearson correlation coefficient and p-value shows a lack of correlation  
6 between KO/WT changes of 5'UTR/CDS RPF ratio and the length of the 5'UTR.

7 (C) Scatter plot with Pearson correlation coefficient and p-value shows a lack of correlation  
8 between KO/WT changes of 5'UTR/CDS RPF ratio and the complexity of the 5'UTR.



**Table S1. Summary of mapping yields. Related to Figure 1.**

| Sample      | Total Reads | rRNA Reads | rRNA % | tRNA Reads | tRNA % | Uniquely mapped | Uniquely mapped % |
|-------------|-------------|------------|--------|------------|--------|-----------------|-------------------|
| WT_RPF_Rep1 | 37,841,903  | 8,694,381  | 22.98  | 2,912,298  | 7.70   | 18,337,209      | 48.46             |
| WT_RPF_Rep2 | 41,311,283  | 10,006,002 | 24.22  | 3,140,614  | 7.60   | 18,093,937      | 43.80             |
| WT_RPF_Rep3 | 27,651,227  | 5,213,243  | 18.85  | 3,271,504  | 11.83  | 14,529,114      | 52.54             |
| WT_RPF_Rep4 | 31,416,924  | 5,075,301  | 16.15  | 4,438,494  | 14.13  | 14,376,247      | 45.76             |
| KO_RPF_Rep1 | 42,707,349  | 9,699,709  | 22.71  | 5,490,768  | 12.86  | 18,440,087      | 43.18             |
| KO_RPF_Rep2 | 50,285,938  | 11,882,349 | 23.63  | 5,465,369  | 10.87  | 22,821,986      | 45.38             |
| KO_RPF_Rep3 | 31,273,724  | 5,781,299  | 18.49  | 3,945,658  | 12.62  | 15,664,530      | 50.09             |
| KO_RPF_Rep4 | 31,428,176  | 5,430,823  | 17.28  | 4,378,329  | 13.93  | 15,554,931      | 49.49             |
| WT_RNA_Rep1 | 21,710,592  | 6,178,898  | 28.46  | 8          | 0.00   | 13,438,120      | 61.90             |
| WT_RNA_Rep2 | 23,910,876  | 5,477,893  | 22.91  | 13         | 0.00   | 16,139,504      | 67.50             |
| WT_RNA_Rep3 | 24,733,196  | 6,045,557  | 24.44  | 9          | 0.00   | 13,790,886      | 55.76             |
| WT_RNA_Rep4 | 24,215,619  | 5,839,474  | 24.11  | 21         | 0.00   | 15,240,569      | 62.94             |
| KO_RNA_Rep1 | 22,786,198  | 6,255,282  | 27.45  | 6          | 0.00   | 14,422,508      | 63.29             |
| KO_RNA_Rep2 | 22,336,008  | 4,676,356  | 20.94  | 3          | 0.00   | 15,456,899      | 69.20             |
| KO_RNA_Rep3 | 22,277,445  | 5,499,488  | 24.69  | 15         | 0.00   | 14,241,759      | 63.93             |
| KO_RNA_Rep4 | 23,636,135  | 6,054,969  | 25.62  | 16         | 0.00   | 15,056,693      | 63.70             |

**Table S2. Overlaps between genes in each regulatory group and FMRP CLIP genes for the hypergeometric tests. Related to Figure 3.**

|                                                                     |                  |        |
|---------------------------------------------------------------------|------------------|--------|
|                                                                     | Translation up   | Others |
| CLIP                                                                | 30               | 800    |
| Non-CLIP                                                            | 212              | 11453  |
| Hypergeometric test with Bonferroni correction: p-value = 0.001     |                  |        |
|                                                                     | Translation down | Others |
| CLIP                                                                | 4                | 826    |
| Non-CLIP                                                            | 250              | 11415  |
| Hypergeometric test with Bonferroni correction: p-value = 1.0       |                  |        |
|                                                                     | Buffering up     | Others |
| CLIP                                                                | 72               | 758    |
| Non-CLIP                                                            | 506              | 11159  |
| Hypergeometric test with Bonferroni correction: p-value = 6.186e-08 |                  |        |
|                                                                     | Buffering down   | Others |
| CLIP                                                                | 6                | 824    |
| Non-CLIP                                                            | 596              | 11069  |
| Hypergeometric test with Bonferroni correction: p-value = 1.0       |                  |        |
|                                                                     | mRNA up          | Others |
| CLIP                                                                | 30               | 800    |
| Non-CLIP                                                            | 484              | 11181  |
| Hypergeometric test with Bonferroni correction: p-value = 1.0       |                  |        |
|                                                                     | mRNA down        | Others |
| CLIP                                                                | 63               | 767    |
| Non-CLIP                                                            | 615              | 11050  |
| Hypergeometric test with Bonferroni correction: p-value = 0.005     |                  |        |

**Table S3. Oligonucleotides used in this paper. Related to SI Materials and Methods.**

| <b>Description</b>                         | <b>Sequence (5'-3')</b>                                         |
|--------------------------------------------|-----------------------------------------------------------------|
| Primer: <i>Gapdh</i> Forward               | AAGGTCATCCCAGAGCTGAA                                            |
| Primer: <i>Gapdh</i> Reverse               | CTGCTTCACCACCTTCTTGA                                            |
| Primer: <i>Actb</i> Forward                | TCTTTGCAGCTCCTTCGTTG                                            |
| Primer: <i>Actb</i> Reverse                | ACGATGGAGGGGAATACAGC                                            |
| Primer: <i>Fmr1</i> Forward                | CGCGGTCCTGGATATACTTC                                            |
| Primer: <i>Fmr1</i> Reverse                | TGGAGCTAATGACCAATCACTG                                          |
| Primer: <i>Nkx2-2</i> Forward              | GCGACAACCCCTACACTC                                              |
| Primer: <i>Nkx2-2</i> mature Reverse       | TCCTTGTCATTGTCCGGTGA                                            |
| Primer: <i>Nkx2-2</i> primary Reverse      | GCTTCTTCCCCAAAACCTCCC                                           |
| Primer: <i>Ndn</i> Forward-1               | CTTGTTCTTTGTATGGGACTGATG                                        |
| Primer: <i>Ndn</i> Reverse-1               | TTGACCTTTCTCTTGCTCAGG                                           |
| Primer: <i>Ndn</i> Forward-2               | AGGACCTGAGCGACCCTAAC                                            |
| Primer: <i>Ndn</i> Reverse-2               | TGCTGCAGGATTTTAGGGTCAAC                                         |
| shRNA: NC                                  | GGAATCTCATTTCGATGCATAC                                          |
| shRNA: <i>Ndn</i>                          | GCTAACCGTGAAATCACCAAG                                           |
| Primer: shNdn cloning first round Forward  | GAATTCGGATCCGTTAACCAGGAAGAGGGCCTATTTCCC<br>AT                   |
| Primer: shNdn cloning first round Reverse  | GAAATCACCAAGCTCTTGACTTGGTGATTTACGGTTAGC<br>CGGATCCTCGTCCTTTCCAC |
| Primer: shNdn cloning second round Forward | GAATTCGGATCCGTTAACCAGGAAGAGGGCCTATTTCCC<br>AT                   |
| Primer: shNdn cloning second round Reverse | CTCCAAGCTTATCGATACAAAAAAGCTAACCGTGAAAT<br>CACCAAGCTCTTGACTTGGTG |
| Marker: 26nt                               | AUGUACACGGAGUCGACCCAACGCGA/3Phos/                               |
| Marker: 34nt                               | AUGUACACGGAGUCGAGCUCAACCCGCAACGCGA/3Phos/                       |
| Adaptor:                                   | rAppTGGAATTCTCGGGTGCCAAGG/ddC/                                  |

|                                                                               |                                                                                                                            |
|-------------------------------------------------------------------------------|----------------------------------------------------------------------------------------------------------------------------|
| RT primer:<br>B is a barcode<br>nucleotide<br>N is a random UMI<br>nucleotide | /5Phos/GBBBBBBNNNNNNNAGATCGGAAGAGCGTCGTG<br>TAGGGAAAGAGTGT/iSp18/CTCGGCATTCTGCTGAACCG<br>CTCTTCCGATCTCCTTGGCACCCGAGAATTCCA |
| Library PCR primer:<br>Forward<br>* indicates a<br>phosphorothioate bond      | AATGATACGGCGACCACCGAGATCTACTCTTTCCCTAC<br>ACGACGCTCTTCCGATC*T                                                              |
| Library PCR primer:<br>Reverse                                                | CAAGCAGAAGACGGCATAACGAGATCGGTCTCGGCATTCC<br>TGCTGAACCGCTCTTCCGATC*T                                                        |
| rRNA depletion probe:<br>Mm-28S-2685-2722                                     | /5BiotinTEG/TTGGGCGCGCGCCGCGGCTGGACGAGGCGCC<br>GCCGCCCT                                                                    |
| rRNA depletion probe:<br>Mm-28S-2927-2933                                     | /5BiotinTEG/AGCGGGCCCCCGGTGGGGCGGGGGGCCCGG<br>ACAC                                                                         |
| rRNA depletion probe:<br>Mm-28S-989-1011                                      | /5BiotinTEG/CGGGGCCCCGGTGGGGGGCGGGGCGGACTGT                                                                                |
| rRNA depletion probe:<br>Mm-28S-1014-1049                                     | /5BiotinTEG/CCAGTGCGCCCGGGCGTCGTCGCGCCGTCG<br>GGTCC                                                                        |
| rRNA depletion probe:<br>Mm-28S-1077-1109                                     | /5BiotinTEG/CGACGAAGCCGAGCGCACGGGGTCGGCGGC<br>GAT                                                                          |
| rRNA depletion probe:<br>Mm-28S-449-484                                       | /5BiotinTEG/GCAGTCCGCCCGGAGGATTCAACCCGGCGGC<br>GCGCG                                                                       |

**Datasets S1. Summary of differential gene expression analysis. Related to Figure 1.**

**Datasets S2. Full lists of enriched GO terms in Biological Process. Related to Figure 1.**

**Datasets S3. Full lists of enriched GO terms in Cellular Component. Related to Figure 1.**

## References

1. Guo W, Patzlaff NE, Jobe EM, & Zhao X (2012) Isolation of multipotent neural stem or progenitor cells from both the dentate gyrus and subventricular zone of a single adult mouse. *Nat Protoc* 7(11):2005-2012.
2. Heyer EE, Ozadam H, Ricci EP, Cenik C, & Moore MJ (2015) An optimized kit-free method for making strand-specific deep sequencing libraries from RNA fragments. *Nucleic Acids Res* 43(1):e2.
3. Darnell JC, *et al.* (2011) FMRP stalls ribosomal translocation on mRNAs linked to synaptic function and autism. *Cell* 146(2):247-261.
4. Li Y, *et al.* (2016) MDM2 inhibition rescues neurogenic and cognitive deficits in a mouse model of fragile X syndrome. *Sci Transl Med* 8(336):336ra361.
5. Smrt RD, *et al.* (2007) Mecp2 deficiency leads to delayed maturation and altered gene expression in hippocampal neurons. *Neurobiol Dis* 27(1):77-89.
6. Luo Y, *et al.* (2010) Fragile x mental retardation protein regulates proliferation and differentiation of adult neural stem/progenitor cells. *PLoS Genet* 6(4):e1000898.
